# Supplementary material
Source: PubMed Central journal article supplement (PMC4442093)

**Supporting Information Figure S3**

**Normal Ovary from patient 1**

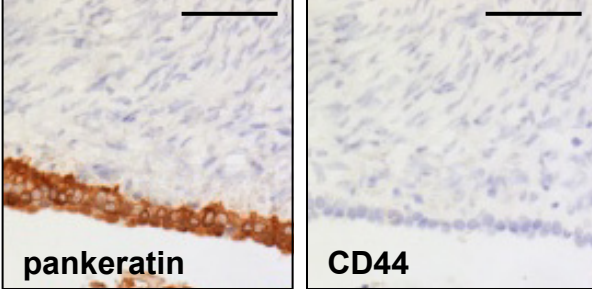

**Normal Ovary from patient 5**

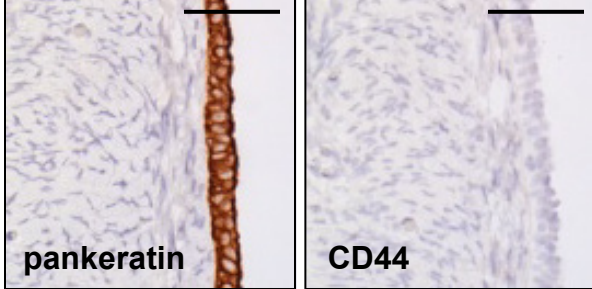

**Normal Ovary from patient 2**

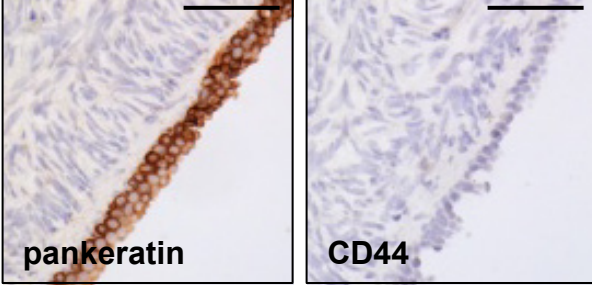

**Normal Ovary from patient 6**

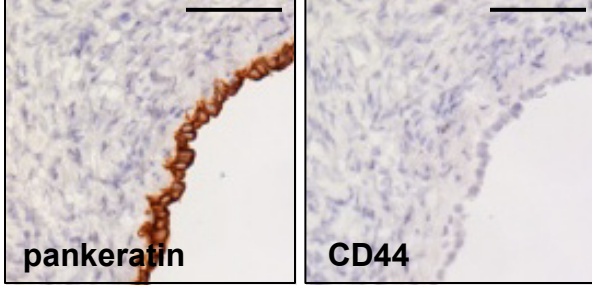

**Normal Ovary from patient 3**

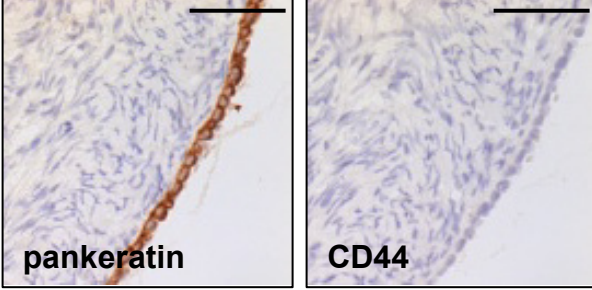

**Normal Ovary from patient 7**

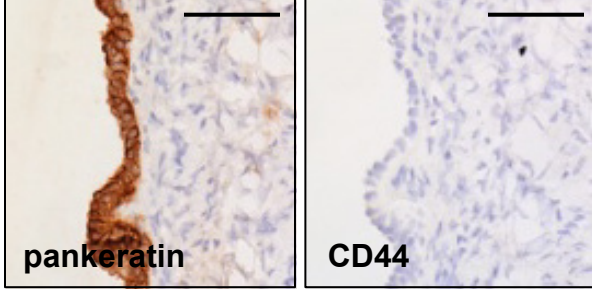

**Normal Ovary from patient 4**

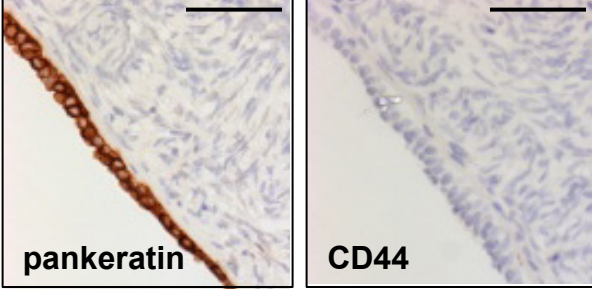

**Normal Ovary from patient 8**

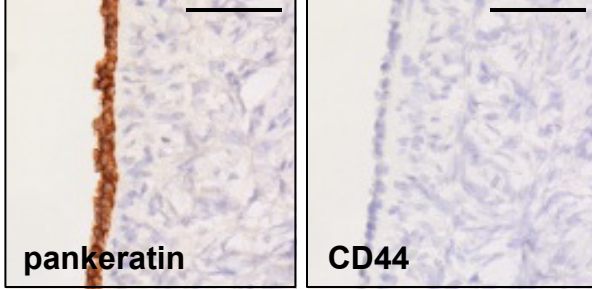

Supplement: NIHMS683683-supplement-Supplementary_Figure_S3.pdf [file NIHMS683683-supplement-Supplementary_Figure_S3.pdf]
