# Supplementary material
Source: PubMed Central journal article supplement (PMC4442093)

Supporting Information Figure S1

A

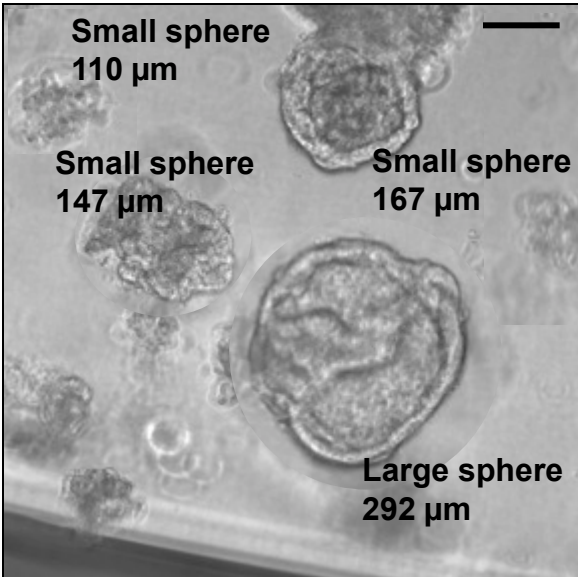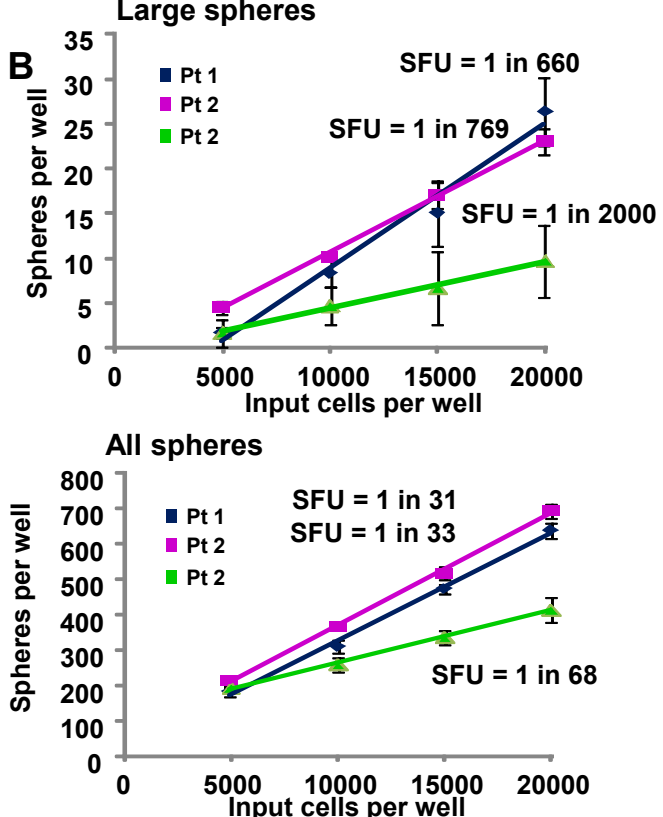

C

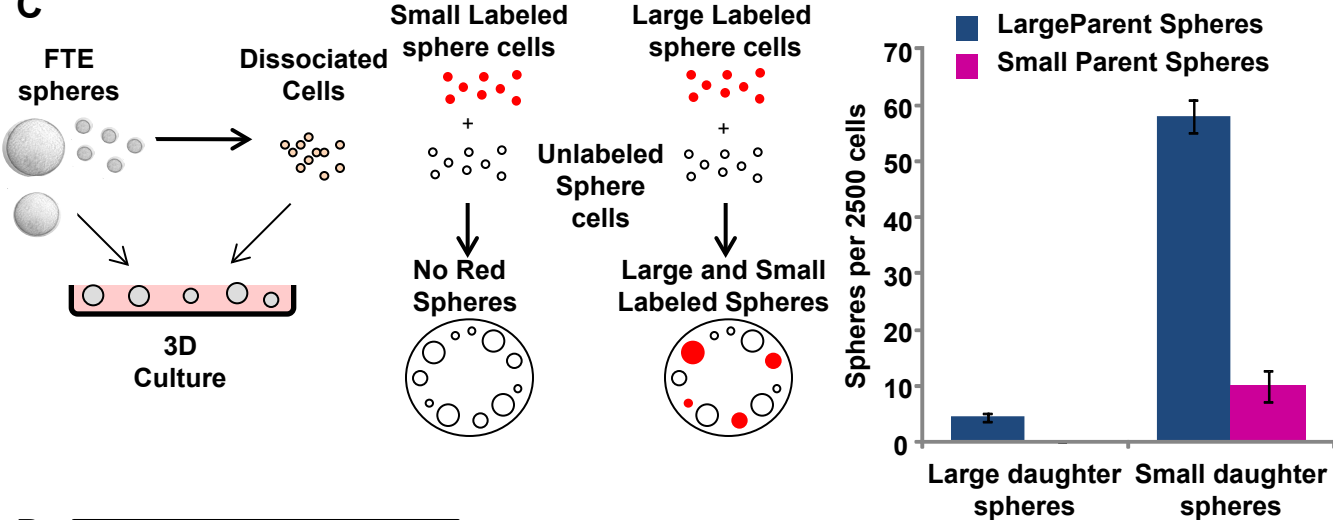

D

| Passage | All Spheres |
|---------|-------------|
| P0      | 3.1 ± 0.2%  |
| P1      | 3.0 ± 0.2%  |
| P2      | 2.9 ± 0.1%  |
| P3      | 3.2 ± 0.2 % |

Supplement: NIHMS683683-supplement-Supplementary_Figure_S1.pdf [file NIHMS683683-supplement-Supplementary_Figure_S1.pdf]

**A Post-menopausal specimen**

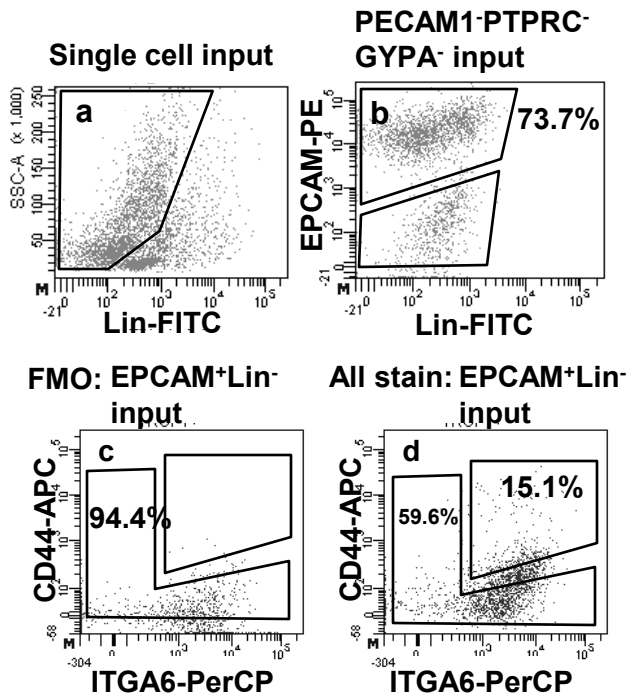

**B Pre-menopausal specimen**

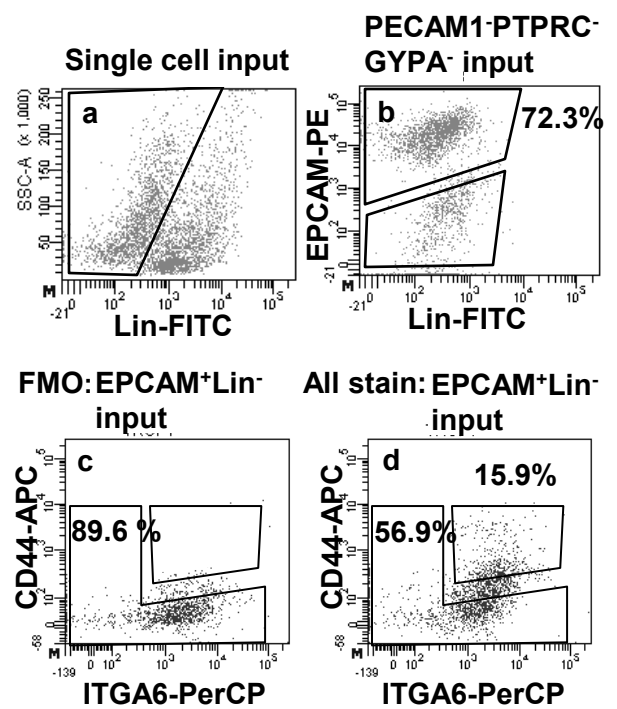

**C**

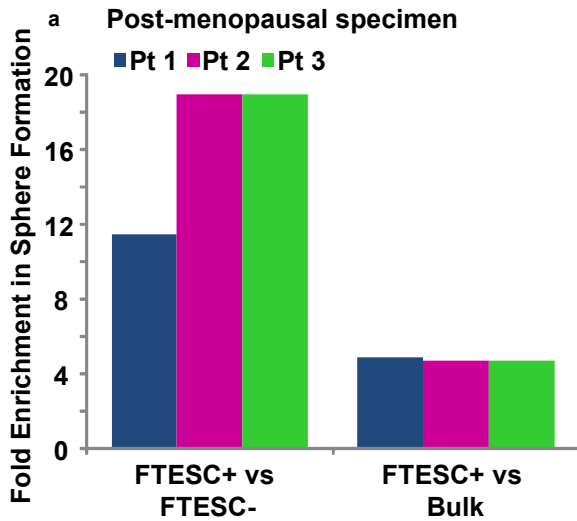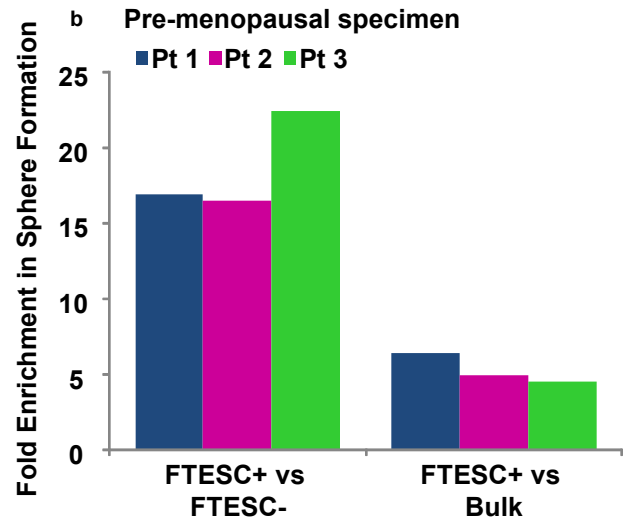

Supplement: NIHMS683683-supplement-Supplementary_Figure_S2.pdf [file NIHMS683683-supplement-Supplementary_Figure_S2.pdf]

**Tubal Intraepithelial Carcinoma #1**

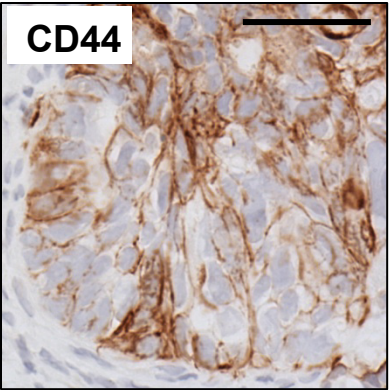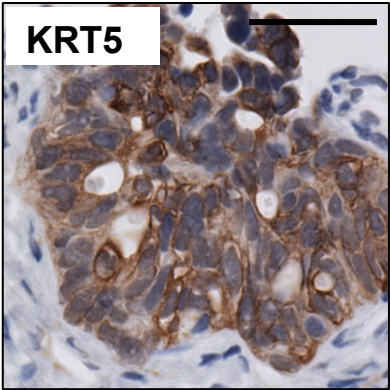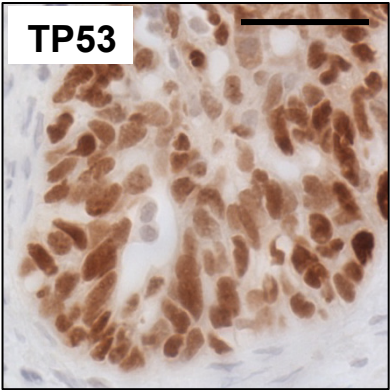

**Tubal Intraepithelial Carcinoma #2**

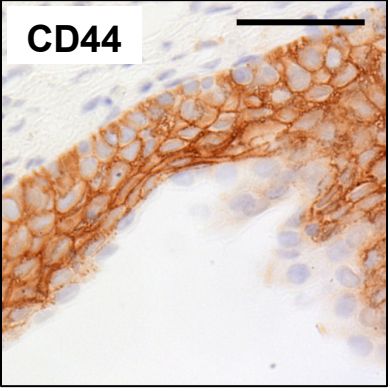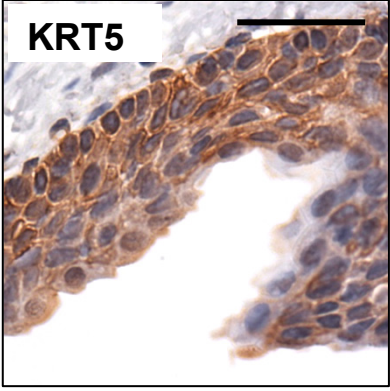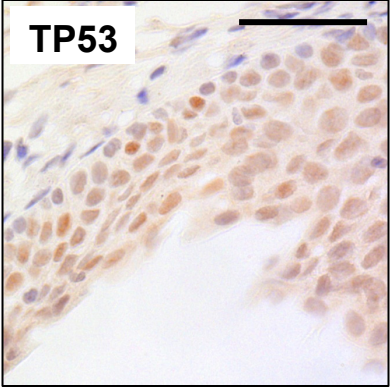

Supplement: NIHMS683683-supplement-Supplementary_Figure_S4.pdf [file NIHMS683683-supplement-Supplementary_Figure_S4.pdf]
